# Supplementary material
Source: PubMed Central journal article supplement (PMC6434457)

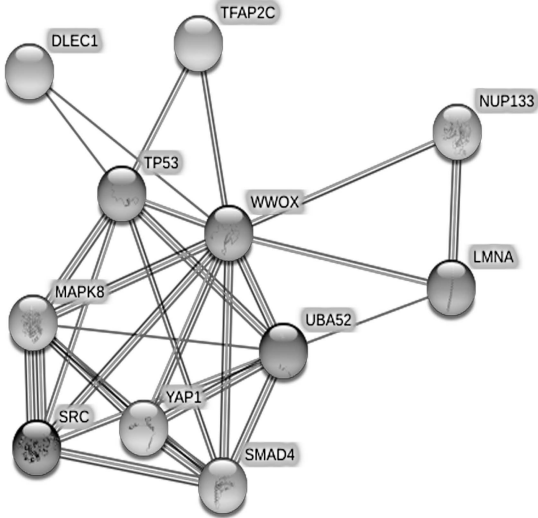

Supplement: 806455_Supplemental_material.pdf [file 806455_Supplemental_material.pdf]
